# Supplementary material for: Sorption Properties of PET Copolyesters and New Approach for Foaming with Filament Extrusion Additive Manufacturing
Source: MDPI journal article supplement (doi:10.3390/polym15051138), 2023-02-24
Supplement: s1 [file s1]

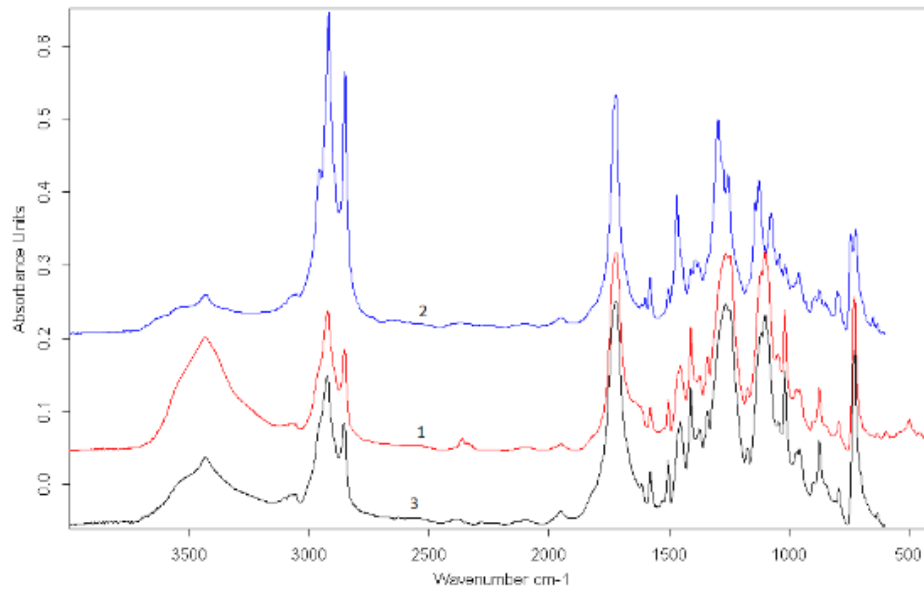

**Figure S1.** FTIR spectrum of PETG polyester; 1 – initial sample; 2 – sample after incomplete desorption; 3 – sample after 1 year of incomplete desorption.

**Table S1.** Process parameters for the production of PETG filaments

| Process parameter                    | Value           |
|--------------------------------------|-----------------|
| Material drying temperature, °C      | 60              |
| Material drying time, hour           | 8 – 10          |
| Extruder temperature profile, °C     | 240-275-260-265 |
| Spinneret forming diameter, mm       | 2.5             |
| Cooling bath temperature, °C         | 70              |
| Die head forming hole, mm            | 2.5             |
| Spinneret drawing, %                 | 200 – 250       |
| Target filament diameter, mm         | 1.62            |
| Ester sorption time, hour            | 9               |
| Sorption temperature, °C             | 20              |
| Extent of sorption, %                | 5.5             |
| Filament diameter after sorption, mm | 1.77            |

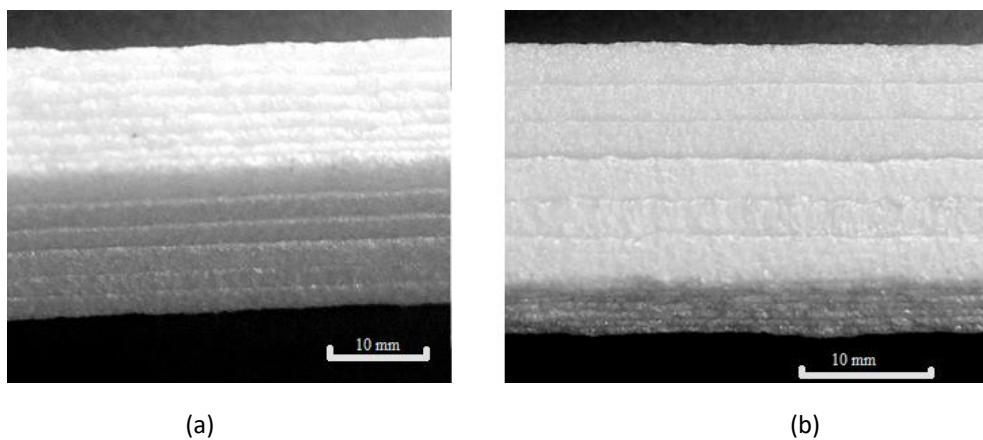

**Figure S2.** Appearance of the surface of the 3D- printed PETG foam: a - view of the surface from above; b - view of the surface of the built platform.
